# Supplementary material for: Association between the COVID-19 pandemic and pertussis in France using multiple nationwide data sources
Source: bioRxiv or medRxiv preprint supplement (doi:10.1101/2021.07.16.21260367), 2021-07-20
Supplement: Supplementary file [file media-2.pdf]

← Post-lockdown period →

| Measures          | Jan-20 | Feb-20 | Mar-20 | Apr-20 | May-20 | Jun-20 | Jul-20 | Aug-20 | Sep-20 | Oct-20 | Nov-20 | Dec-20 |
|-------------------|--------|--------|--------|--------|--------|--------|--------|--------|--------|--------|--------|--------|
| National lockdown |        |        |        |        |        |        |        |        |        |        |        |        |
| Schools closed    |        |        |        |        |        |        |        |        |        |        |        |        |
| Curfew            |        |        |        |        |        |        |        |        |        |        |        |        |

**Supplementary Figure 1. French COVID-19 mitigation measures in 2020.** Mitigation measures are represented in dark gray, periods when schools were closed because of holidays are represented in light gray
